# Supplementary material for: Physiologically‐Based Pharmacokinetic Modeling of Fluconazole Using Plasma and Cerebrospinal Fluid Samples From Preterm and Term Infants
Source: PubMed Central journal article supplement — CPT Pharmacometrics Syst Pharmacol. 2019 May 22;8(7):500–10. doi: 10.1002/psp4.12414 (PMC6656941; doi:10.1002/psp4.12414), 2019-05-22
Supplement: PSP4-8-500-s002.pdf [file PSP4-8-500-s002.pdf]

Physiologically-Based Pharmacokinetic (PBPK) Modeling of  
Fluconazole Using Plasma and Cerebrospinal Fluid Samples from  
Preterm and Term Infants

SUPPLEMENTARY MATERIAL S2 – PBPK Model Building Process and Input  
Parameters

## Model Building Process

1. Create the healthy adult model in PK-Sim<sup>®</sup>. See Compound File and Healthy Adult Individual and Population files below.
2. Scale the healthy adult model to infants in PK-Sim. See Infant Individual and Population files below.
  - a. In the Infant Population file, change the alpha-1 acid glycoprotein ontogeny based on the Maharaj et al equation:

$$AAG_{OF} = \frac{PNA^{0.735}}{11.53^{0.735} + PNA^{0.735}}$$

where  $AAG_{OF}$  is the ontogeny factor for alpha-1 acid glycoprotein and PNA is the postnatal age in days.

3. For all simulations, a standard deviation of 0.2225, equal to 25% of the mean of 0.89, was included for fraction unbound under User Defined Variability.

## Reference

1. Maharaj, A. R., Gonzalez, D., Cohen-Wolkowicz, M., Hornik, C. P., & Edginton, A. N. Improving pediatric protein binding estimates: An evaluation of  $\alpha$ 1-acid glycoprotein maturation in healthy and infected subjects. *Clin. Pharmacokinet.* **57**, 577-589 (2018).

| <b>FLUCONAZOLE COMPOUND FILE</b> |                                   |
|----------------------------------|-----------------------------------|
| <b>Basic Physico-chemistry</b>   |                                   |
| Is small molecule                | Yes                               |
| Lipophilicity                    | 1.10                              |
| Fraction unbound                 |                                   |
| Binds to                         | $\alpha$ 1-acid-glycoprotein      |
| Fraction unbound                 | 0.89                              |
| Species                          | Human                             |
| Molweight                        |                                   |
| Molecular weight                 | 306.271 g/mol                     |
| Has halogens                     | Yes (2 F)                         |
| Effective molecular weight       | 272.27 g/mol                      |
| Compound type / pKa              |                                   |
| Compound type                    | Base                              |
| pKa                              | 2.56                              |
| Solubility                       |                                   |
| Solubility at reference pH       | 1.00 $\mu$ g/mL                   |
| Solubility reference pH          | 7.00                              |
| Solubility gain per charge       | 1000                              |
| <b>Absorption</b>                |                                   |
| Specific intestinal permeability | $2.22e^{-6}$ cm/min               |
| <b>Distribution</b>              |                                   |
| Distribution Calculation         |                                   |
| Calculation methods              |                                   |
| Partition coefficients           | Rodgers and Rowland               |
| Cellular permeabilities          | PK-Sim Standard                   |
| Specific organ permeability      | $8.89e^{-4}$ cm/min               |
| <b>Metabolism</b>                |                                   |
| Metabolizing Enzymes             |                                   |
| UGT2B7                           |                                   |
| Species                          | Human                             |
| Process type                     | Intrinsic clearance – First Order |
| Volume (liver)                   | 2.36 L                            |
| Fraction intracellular           | 0.67                              |
| Intrinsic clearance              | $8.00e^{-3}$ L/min                |
| Specific clearance               | $5.09e^{-3}$ 1/min                |
| <b>Transport &amp; Excretion</b> |                                   |
| Renal Clearances                 |                                   |
| Species                          | Human                             |
| Process type                     | Glomerular filtration             |
| GFR fraction                     | 0.30                              |
| <b>Advanced Parameters</b>       |                                   |
| Default values                   |                                   |

| <b>HEALTHY ADULT INDIVIDUAL FILE</b> |                                                   |
|--------------------------------------|---------------------------------------------------|
| <b>Biometrics</b>                    |                                                   |
| Species                              | Human                                             |
| Population                           | European (ICRP, 2002)                             |
| Gender                               | Male                                              |
| Calculation methods                  |                                                   |
| Body surface area                    | Mosteller                                         |
| Endothelial surface areas            | Organ vascularization                             |
| Age                                  | 30 years                                          |
| Weight                               | 73 kg                                             |
| Height                               | 176 cm                                            |
| BMI                                  | 23.57 kg/m <sup>2</sup>                           |
| <b>Anatomy &amp; Physiology</b>      |                                                   |
| Default values                       |                                                   |
| <b>Expression</b>                    |                                                   |
| Metabolizing Enzymes                 |                                                   |
| UGT2B7                               | PK-Sim <sup>®</sup> Gene Database, default values |
| Data Transfer Overview               | RT-PCR                                            |

| <b>HEALTHY ADULT POPULATION FILE</b> |                                                   |
|--------------------------------------|---------------------------------------------------|
| <b>Demographics</b>                  |                                                   |
| Number of individuals                | 500                                               |
| Proportion of females                | 50%                                               |
| Age range                            | 18-55 years                                       |
| <b>Expression</b>                    |                                                   |
| Metabolizing Enzymes                 |                                                   |
| UGT2B7                               | PK-Sim <sup>®</sup> Gene Database, default values |

| <b>INFANT INDIVIDUAL FILE</b> |                                                   |
|-------------------------------|---------------------------------------------------|
| <b>Biometrics</b>             |                                                   |
| Species                       | Human                                             |
| Population                    | Preterm                                           |
| Gender                        | *                                                 |
| Age                           | *                                                 |
| Weight                        | *                                                 |
| Height                        | *                                                 |
| BMI                           | *                                                 |
| <b>Anatomy and physiology</b> |                                                   |
| Default values                |                                                   |
| <b>Expression</b>             |                                                   |
| Metabolizing Enzymes          |                                                   |
| UGT2B7                        | PK-Sim <sup>®</sup> Gene Database, default values |
| Data Transfer Overview        | RT-PCR                                            |

\* This value was set to match each infant's individual value for the prophylaxis and PPRU studies.

| <b>INFANT POPULATION FILE – PROPHYLAXIS STUDY</b> |                                                   |
|---------------------------------------------------|---------------------------------------------------|
| <b>Demographics</b>                               |                                                   |
| Number of individuals                             | 1000                                              |
| Proportion of females                             | 63%                                               |
| Age range                                         | 2 – 6 days                                        |
| Gestational age range                             | 24 – 29 weeks                                     |
| Weight range                                      | 0.35 – 0.85 kg                                    |
| <b>Expression</b>                                 |                                                   |
| Metabolizing Enzymes                              |                                                   |
| UGT2B7                                            | PK-Sim <sup>®</sup> Gene Database, default values |

| <b>INFANT POPULATION FILE – PPRU STUDY</b> |                                                   |
|--------------------------------------------|---------------------------------------------------|
| <b>Demographics</b>                        |                                                   |
| Number of individuals                      | 100                                               |
| Proportion of females                      | 54                                                |
| Age range                                  | 1 – 79 days                                       |
| Gestational age range                      | 24 – 40 weeks                                     |
| Weight range                               | 0.45 – 7.13 kg                                    |
| <b>Expression</b>                          |                                                   |
| Metabolizing enzymes                       |                                                   |
| UGT2B7                                     | PK-Sim <sup>®</sup> Gene Database, default values |
