# Supplementary material for: Physiologically‐Based Pharmacokinetic Modeling of Fluconazole Using Plasma and Cerebrospinal Fluid Samples From Preterm and Term Infants
Source: PubMed Central journal article supplement — CPT Pharmacometrics Syst Pharmacol. 2019 May 22;8(7):500–10. doi: 10.1002/psp4.12414 (PMC6656941; doi:10.1002/psp4.12414), 2019-05-22
Supplement: PSP4-8-500-s004.pdf [file PSP4-8-500-s004.pdf]

Physiologically-Based Pharmacokinetic (PBPK) Modeling of  
Fluconazole Using Plasma and Cerebrospinal Fluid Samples from  
Preterm and Term Infants

TABLE S1

Supplementary Table 1. Parameters used in model development

| Parameter                         | Value                        | Source                                       |
|-----------------------------------|------------------------------|----------------------------------------------|
| <b>PHYSICOCHEMICAL PROPERTIES</b> |                              |                                              |
| Molecular weight                  | 306.27 g/mol                 | Literature <sup>1</sup>                      |
| Effective molecular weight        | 272.27 g/mol                 | Literature <sup>1</sup>                      |
| pKa value                         | 2.56                         | Literature <sup>1</sup>                      |
| Compound type                     | weak base                    | Literature <sup>1</sup>                      |
| Lipophilicity                     | 1.10                         | Optimized value <sup>a</sup>                 |
| Protein binding partner           | alpha-1 acid glycoprotein    | Literature <sup>2,3</sup>                    |
| Fraction unbound                  | 0.89                         | Literature <sup>4</sup>                      |
| Solubility                        | 1 µg/mL                      | Literature <sup>1</sup>                      |
| Solubility reference pH           | 7.0                          | Literature <sup>1</sup>                      |
| Solubility gain per charge        | 1000                         | Literature <sup>1</sup>                      |
| Blood to plasma ratio             | 1.0                          | Literature <sup>2</sup>                      |
| <b>ABSORPTION</b>                 |                              |                                              |
| Specific intestinal permeability  | 2.22e <sup>-6</sup> cm/min   | Calculated value <sup>b</sup>                |
| Specific organ permeability       | 8.89e <sup>-4</sup> cm/min   | Calculated value <sup>c</sup>                |
| <b>DISTRIBUTION</b>               |                              |                                              |
| Partition coefficients            | Rodgers & Rowland            | Literature <sup>5</sup>                      |
| Cellular permeabilities           | PK-Sim <sup>®</sup> Standard | PK-Sim <sup>®</sup> algorithm <sup>6,7</sup> |
| <b>METABOLISM</b>                 |                              |                                              |
| UGT2B7                            |                              |                                              |
| Intrinsic clearance               | 0.008 L/min                  | Optimized value <sup>a</sup>                 |
| Specific clearance                | 0.005 1/min                  | Calculated value <sup>d</sup>                |
| <b>EXCRETION</b>                  |                              |                                              |
| GFR fraction                      | 0.30                         | Optimized value                              |

<sup>a</sup> Lipophilicity and UGT2B7 intrinsic clearance optimization using the prophylaxis study data resulted in very similar values as those optimized in a previous pediatric fluconazole PBPK model, and so the original values were retained.<sup>8</sup>

<sup>b</sup>  $266 * (MW_{eff} * 10^9)^{-4.5} * 10^{logP} * 60 * 10^{-1}$ ; where  $MW_{eff}$  is the effective molecular weight and  $logP$  is the lipophilicity measure.

<sup>c</sup>  $\left(\frac{MW_{eff} * 10^9}{336}\right)^{-6} * \frac{10^{logP}}{5} * 10^{-5}$ ; where  $MW_{eff}$  is the effective molecular weight and  $logP$  is the lipophilicity measure.

<sup>d</sup>  $\frac{CL_{int}}{Vol_{liv} * f_{intra,liv}}$ ; where  $CL_{int}$  is the intrinsic clearance,  $Vol_{liv}$  is the liver volume, and  $f_{intra,liv}$  is the liver intracellular fraction.

UGT2B7:;5'-diphosphoglucuronosyltransferase 2B7; GFR: glomerular filtration rate

## References

1. Wishart, D.S. *et al.* DrugBank: A comprehensive resource for in silico drug discovery and exploration. *Nucleic Acids Res.* **34**, D668-D672 (2006).
2. Arredondo, G., Calvo, R., Marcos, F., Martinez-Jorda, R. & Suarez, E. Protein binding of itraconazole and fluconazole in patients with cancer. *Int. J. Clin. Pharmacol. Ther.* **33**, 449-452 (1995).
3. Arredondo, G., Calvo, R., Marcos, F., Martinez-Jorda, R. & Suarez, E. Protein binding of itraconazole and fluconazole in patients with chronic renal failure. *Int. J. Clin. Pharmacol. Ther.* **32**, 361-364 (1994).
4. Humphrey, M.J., Jevons, S. & Tarbit, M.H. Pharmacokinetic evaluation of UK-49,858, A metabolically stable triazole antifungal drug, in animals and humans. *Antimicrob. Agents Chemother.* **28**, 648-653 (1985).
5. Rodgers, T. & Rowland, M. Physiologically based pharmacokinetic modelling 2: Predicting the tissue distribution of acids, very weak bases, neutrals and zwitterions. *Int. J. Drug Dev. Res.* **95**, 1238-1257 (2006).
6. Willmann, J., Lippert, J., Sevestre, M., Solodenko, J., Fois, F., & Schmitt, W. PK-Sim<sup>®</sup>: a physiologically based pharmacokinetic ‘whole-body’ model. *Biosilico.* **1**, 121-124 (2003).
7. Willmann, J., Lippert, J., & Schmitt, W. From physicochemistry to absorption and distribution: predictive mechanistic modelling and computational tools. *Expert Opin. Drug Metab. Toxicol.* **1**, 159-168 (2005).
8. Watt, K. M. *et al.* Physiologically Based Pharmacokinetic Approach to Determine Dosing on Extracorporeal Life Support: Fluconazole in Children on ECMO. *CPT Pharmacometrics Syst. Pharmacol.* **7**, 629–637 (2018).
